# Supplementary material
Source: publisher figshare collection journal article supplement (https://rs.figshare.com/ndownloader/files/13710536)
Supplement: Supplementary file 1 [file 13710536]

**Table S1. The primers used in this study.**

| **Name** | **Sequence** |  |
| --- | --- | --- |
| *dcl1-UP-F* | GGGTTTAAUTGGACACCGGGGAGGTAGCTTC |  |
| *dcl1-UP-R* | GGACTTAAUCCTCTCAAGCAAGCATGCGCAG |
| *dcl1*-DN-F | GGCATTAAUAAGCTGTCAATTGATGCGGAGG |  |
| *dcl1*-DN-R | GGTCTTAAUTAGCCTGGTAGGTGGCATTCAATTA |
| *dcl2*-up-F | GGGTTTAAUTGGCATCTTCGGCATTT |  |
| *dcl2*-up-R | GGACTTAAUGCTACACCGTTGTTAGGG |  |
| *dcl2*-dn-F | GGCATTAAUATTGGCAGAGTTCTTAGGTT |  |
| *dcl2*-dn-R | GGTCTTAAUCAGGCTCCAGTTTGACG |  |
| *ago1*-up-F | GGGTTTAAUTCCGTCAGAGTAACGAAGGAA |  |
| *ago1*-up-R | GGACTTAAUGAAGCAGTTCTTGCGTGGAT |  |
| *ago1*-dn-F | GGCATTAAUACCACAACCACCTACAGCAAT |  |
| *ago1*-dn-R | GGTCTTAAU CTTTTTGGGAAGTATTGAGCAGGT |  |
| *ago2*-up-F | GGGTTTAAUGCAGGAGCCGGAGAAA |  |
| *ago2*-up-R | GGACTTAAUTGTGCGAGAATCCAAACC |  |
| *ago2*-dn-F | GGCATTAAUTGGAAACGGCGTGCTT |  |
| *ago2*-dn-R | GGTCTTAAUGACTTGGTGCGTCGTGTAA |  |
| VdHy1-up-F | GGGTTTAAUGAAATTGGCAATTACACGGAA |  |
| VdHy1-up-R | GGACTTAAU ATCTCCTGGCTAGTCCAACGA |  |
| VdHy1-dn-F | GGCATTAAUTCAATTCCCCGATCGGAAG |  |
| VdHy1-dn-R | GGTCTTAAUCCAGCTCGTTCGTTATGCGGT |  |
| VdmilR1-up-F | GGGTTTAAUTGACGCCGTTGTTGTTGC |  |
| VdmilR1-up-R | GGACTTAAUCTTCCACGCCTCGACGAT |  |
| VdmilR1-dn-F | GGCATTAAUGGGGTTCAATTCCCCGATC |  |
| VdmilR1-dn-R | GGTCTTAAUAGACGGGCCATCAAGATTCG |  |
|  |  |  |
| *VdMILR1*-if-F | AACCTCTAGAGGATCCGCCACCTTTCCAGGTTTATGCGATCA |  |
| *VdMILR1*-if-R | GCAGCTTCTGCGAATTCCAAGCCGATATCCTAACCACTAG |  |
| *VdR3*-if-F | AACCTCTAGAGGATCCGCCACCATGGCGACGAACA |  |
| *VdR3*-if-R | GCAGCTTCTGCGAATTCCTGGAGAGCTAATTGCG |  |
| VdHy1-HE-F1 | CGGCCAGTGCCAAGCTTGTCTCGCCACCAGTCT |  |
| VdHy1-HE-R1 | GCAGCTTCTGCGAATTCGCCTTGAAGAGCGATGACAAGCC |  |
|  |  |  |
| VdR3-qRT-F | CGGATCCTAAGAAGCTCGAC |  |
| VdR3-qRT-R | TGATTTCCTCCGGTAGAAGC |  |
| VdHy1-qRT-F1 | ATGTCCATCCTGGGAGTAGC |  |
| VdHy1-qRT-R1 | GTATCCGCTTGCTCTCCTTC |  |
| VdHy1-qRT-F2 | CATTCACGCAATATCAAG |  |
| VdHy1-qRT-R2 | TATCCTAACCACTAGACTAA |  |
| VdMILR1-qRT-F | ATGAGCAGTTAGCATTTGCG |  |
| VdMILR1-qRT-R | CACTAGACTAATCGGAACTCGATG |  |
| DCL1-qRT-F | GATGGTACGCGAGAGTGAGA |  |
| DCL1-qRT-R | CTGATCCAGTGGGTAACACG |  |
| DCL2-qRT-F | GCATCCGAGTCTGCAAAGTA |  |
| DCL2-qRT-R | ATGTATTCGGGCCTCTTGTC |  |
| AGO1-qRT-F | ACAAGGATGGCAAGGAAATC |  |
| AGO1-qRT-R | GGTGCAATGGTACAAGCATC |  |
| AGO2-qRT-F | CCTGTCCAACTTTCTCAGCA |  |
| AGO2-qRT-R | TCTTGAGAACGTCCCTGTTG |  |
| VdTub-qRT-F | ACCTTCGTCGGTAACTCCAC |  |
| VdTub-qRT-R | TGGACTCAGCCTCAGTGAAC |  |
| VdmilR1-qRT-F | GGCCCGTTCCGATTAGTCTAGTGGTTA |  |
| VdU6-qRT-F | ACACGCTCAATCAAAGAGAAGCTACAAA |  |
|  |  |  |
| eGFP-qRT-F | CCGACCACATGAAGCAGCAC |  |
| eGFP-qRT-R | TCGCCCTCGAACTTCACCTC |  |
| VdHy1-3’UTR-if-F1 | TGCTGGTGCTGGATCCAAATCCCACAGGTCT |  |
| VdHy1-3’UTR-if-R1 | CGCTATAATCGAATTCGCCTTGAAGAGCGATGACA |  |
| VdHy1m-F | GGTGAGCGCGGTTATCGCCTGATCCAA AAACGATCC |  |
| VdHy1m-R | GTCAACTTGATATTGCGTGAATGAGTGGGGATGTCGCCTG |  |
| VdHy1-pro-F | ACCTTCGCTCAGTGCATCGG |  |
| VdHy1-pro-R | TCACCCGACGACTTGACTGC |  |
|  |  |  |
| DCL1-Test-F | ATCTGTGGCGAAACC |  |
| DCL1-Test-R | GAGCCTGAATGTGGG |  |
| DCL2-Test-F | TTGAATGTCTGGCTTGGT |  |
| DCL2-Test-R | TGTTACTGGGTGCGTCTT |  |
| AGO1-Test-F | CGACTGCCGCTTTGGT |  |
| AGO1-Test-R | CGTGAGCATTTCGTTAGTGT |  |
| AGO2-Test-F | AAGGGTGAGAATAGCAACAAGA |  |
| AGO2-Test-R | CAACCGAAACGGCAGTCC |  |
| VdHy1-Test-F | AAAAGCCTTGTCTATTGTCC |  |
| VdHy1-Test-R | GATTGCCAGAATGTCGTG |  |
